# Supplementary material for: Silver-Polystyrene (Ag/PS) Nanocomposites Doped with Polyvinyl Alcohol (PVA)—Fabrication and Bactericidal Activity
Source: PubMed Central journal article supplement (PMC7697651; doi:10.3390/nano10112245), 2020-11-12
Supplement: nanomaterials-10-02245-s001.pdf [file nanomaterials-10-02245-s001.pdf]

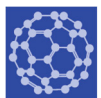

Supplementary Materials

# Silver-Polystyrene (Ag/PS) Nanocomposites Doped With Polyvinyl Alcohol (PVA) – Fabrication and Bactericidal Activity

Anna Krzywicka and Elżbieta Megiel \*

Faculty of Chemistry, University of Warsaw, Pasteura 1, 02-093 Warsaw, Poland; krzywaa95@gmail.com

\*Correspondence: emegiel@chem.uw.edu.pl

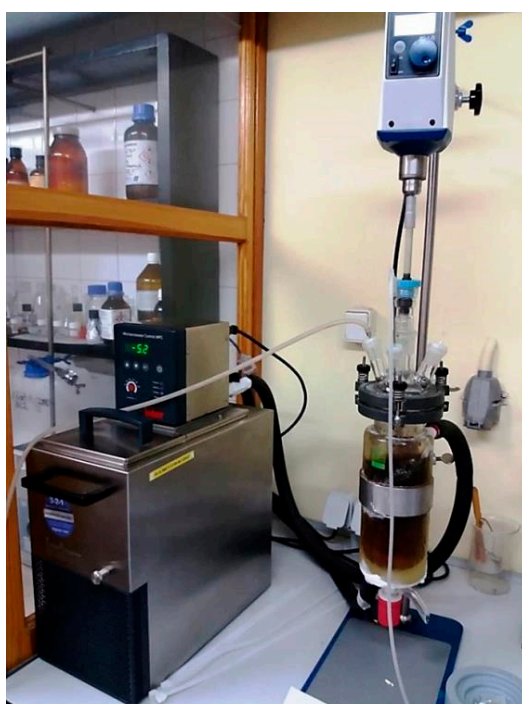

**Figure S1.** The photograph of the lab set employed for the N-AgNPs preparation taken during the synthesis.

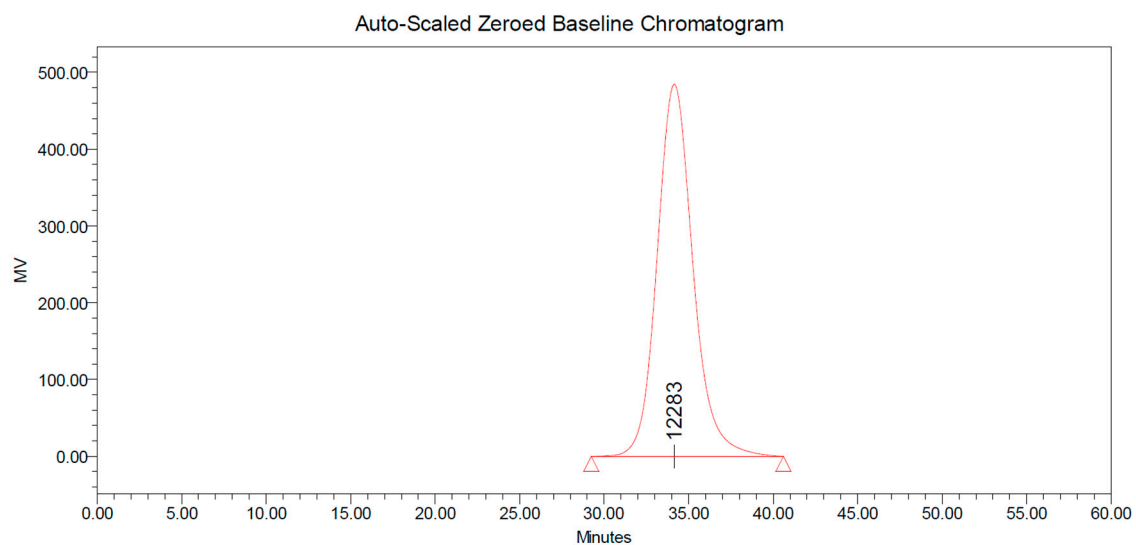

**Figure S2.** The elugram obtained from SEC for PSF sample.

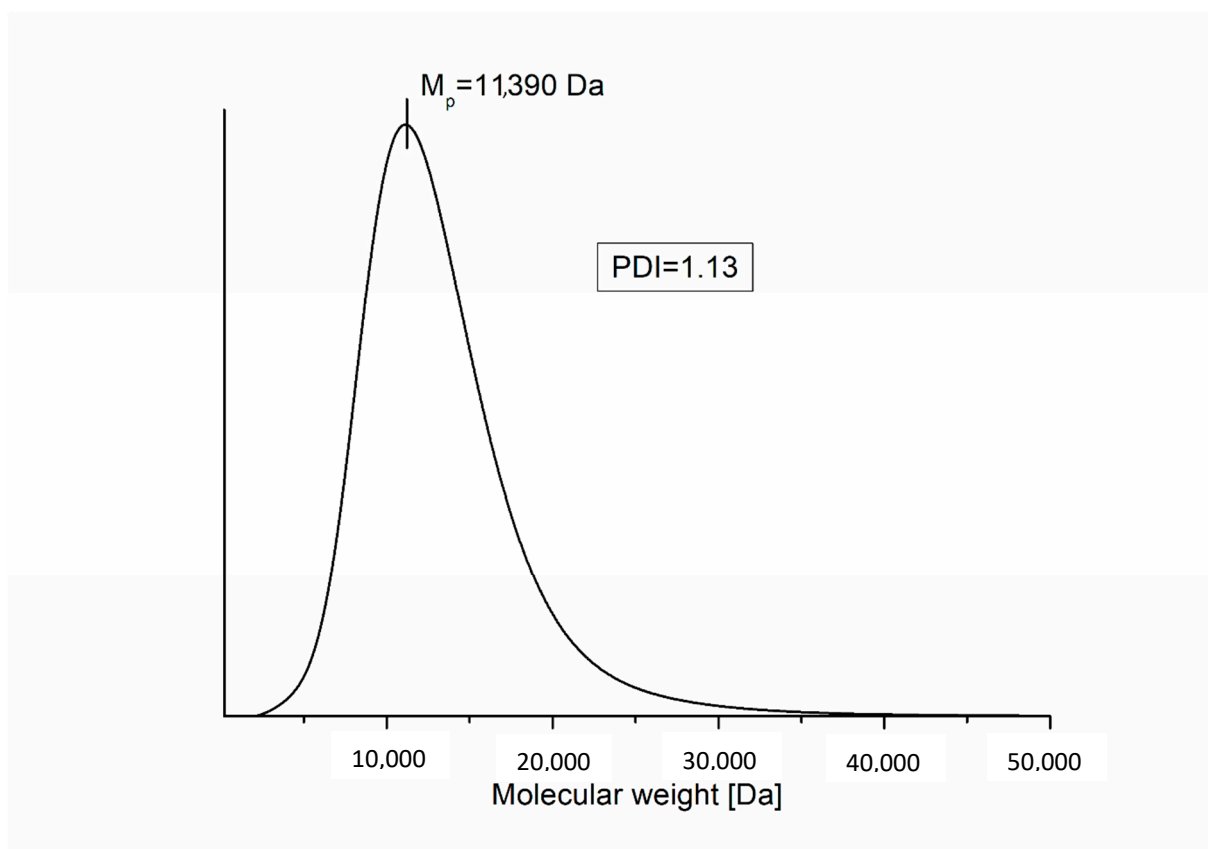

**Figure S3.** The molecular weights distribution in the sample PSF determined on the base of SEC analyses.
